# Supplementary material
Source: Springer Nature journal article supplement (https://www.springermedizin.de/resource/supplementary/12876_2013_1098_MOESM2_ESM.pdf/9438416)

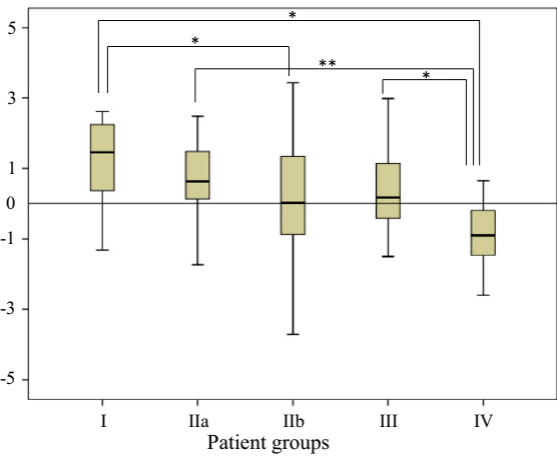

Supplement: MOESM2 [file 9438416]
